# Supplementary material for: Tumor microenvironment assessment-based signatures for predicting response to immunotherapy in non-small cell lung cancer
Source: PubMed Central journal article supplement (PMC11647137; doi:10.1016/j.isci.2024.111340), 2024-11-13
Supplement: mmc1.pdf [file mmc1.pdf]

**Supplemental information**

**Tumor microenvironment assessment-based  
signatures for predicting response  
to immunotherapy in non-small cell lung cancer**

**Jiani Wu, Yuanyuan Wang, Zhenhua Huang, Jingjing Wu, Huiying Sun, Rui Zhou, Wenjun Qiu, Zilan Ye, Yiran Fang, Xiatong Huang, Jianhua Wu, Jianping Bin, Yulin Liao, Min Shi, Jiguang Wang, Wangjun Liao, and Dongqiang Zeng**

# Supplementary Materials

# Figure S1

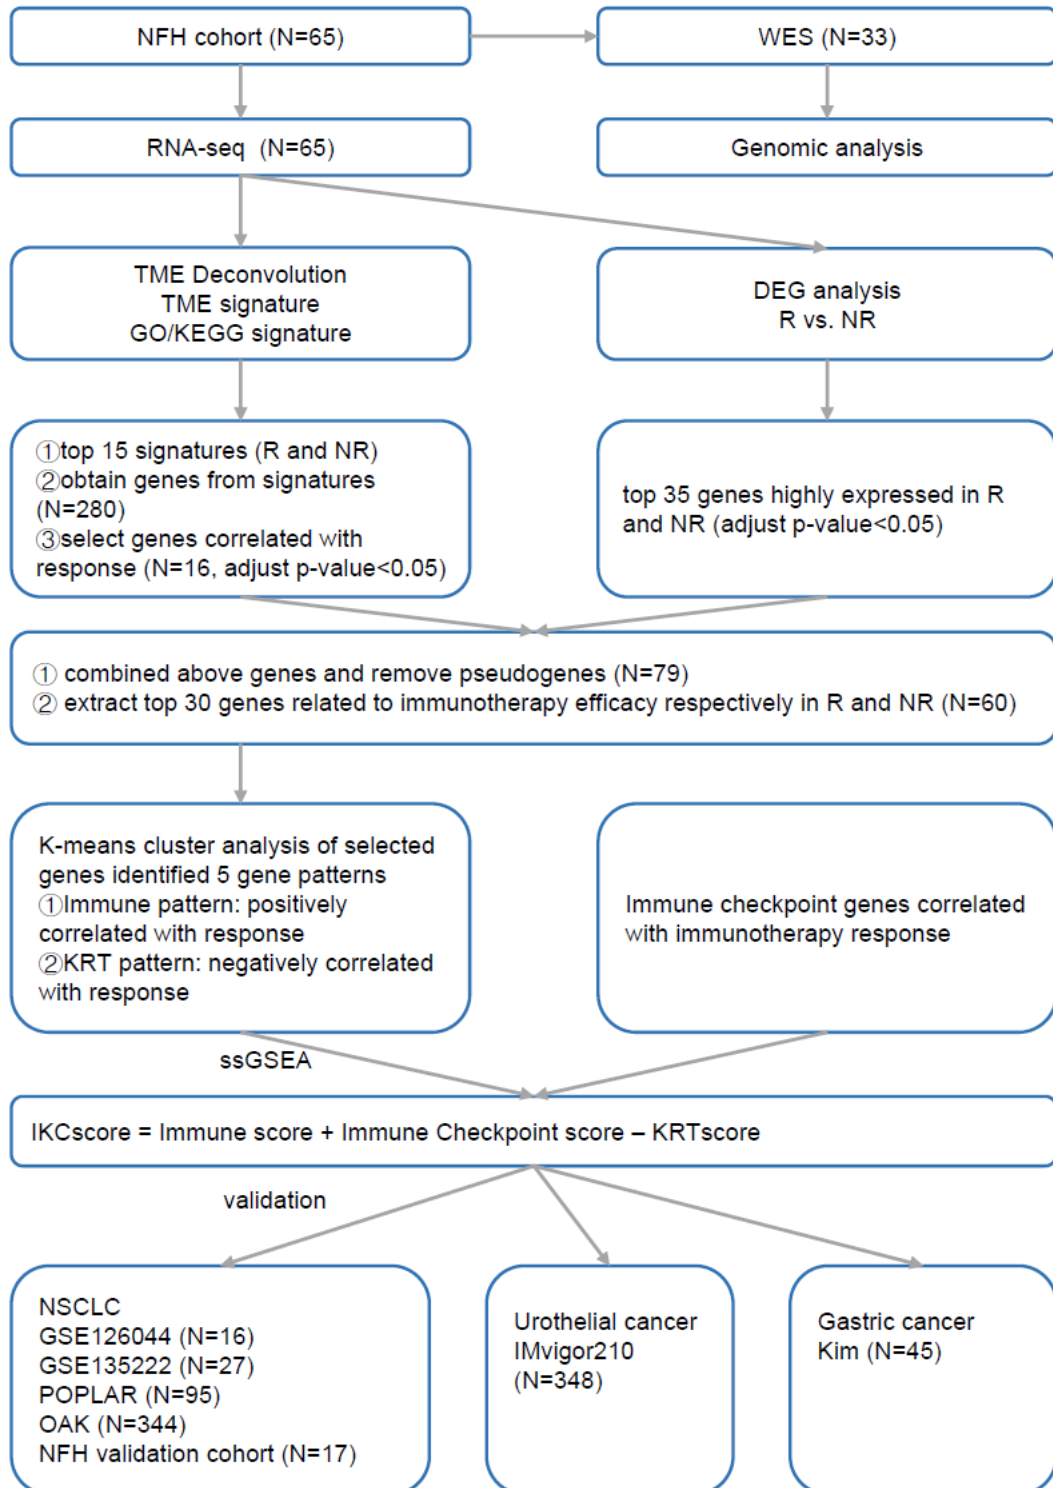

**Figure S1 IKCscore construction flowchart, related to Figure 1.**

The flowchart shows the IKCscore construction process including signature selection, gene selection and calculation.



# Figure S3

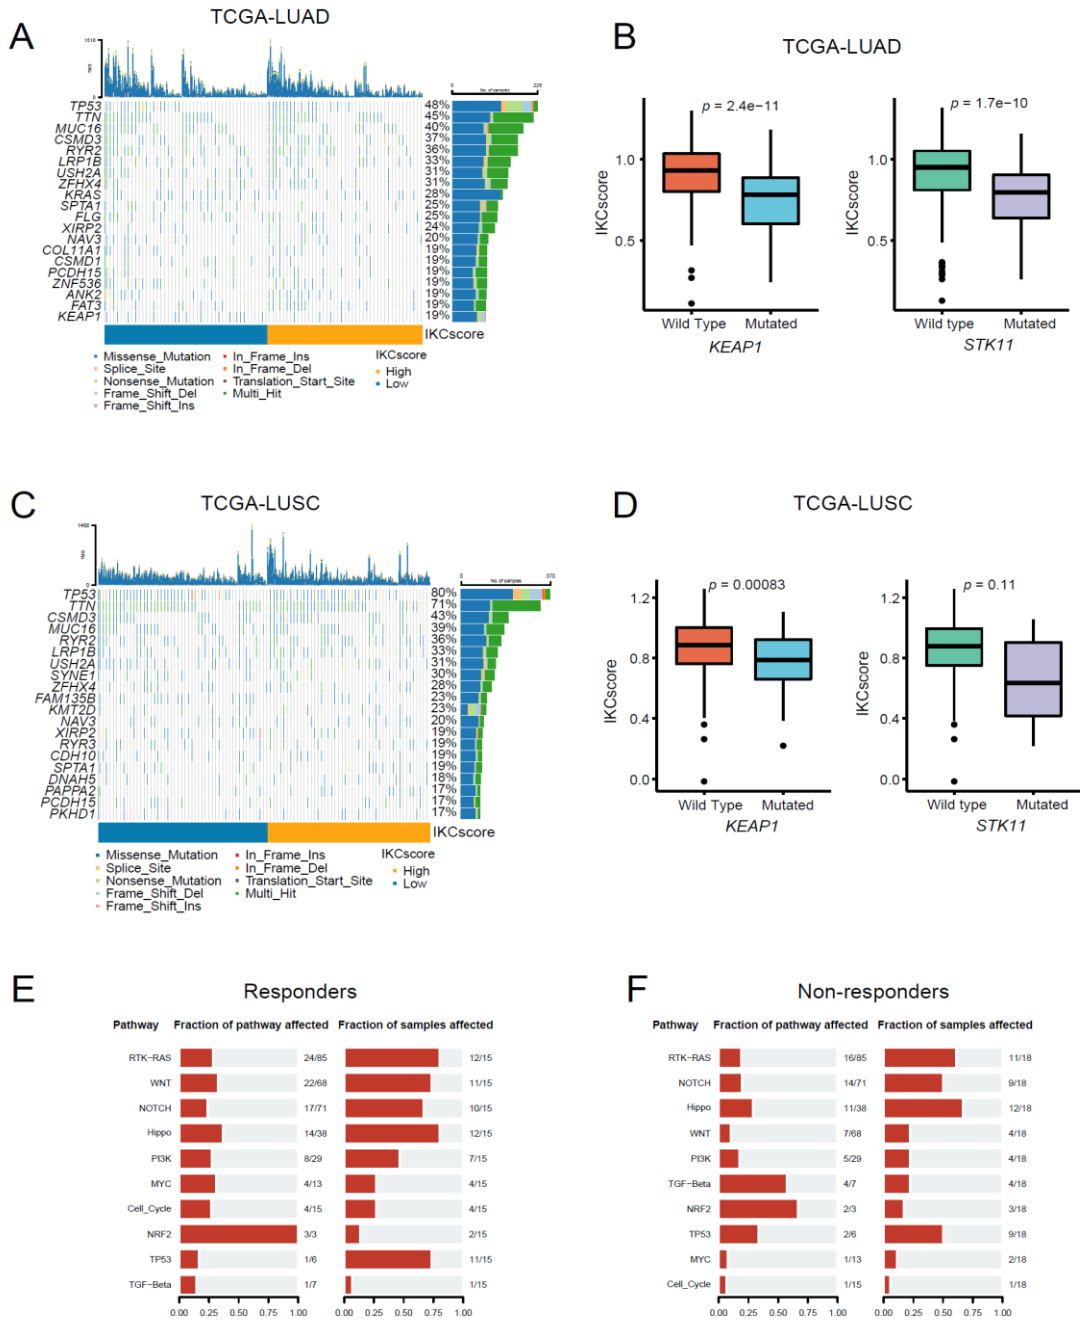

**Figure S3 Mutational features associated with IKCscore and responses to immunotherapy, related to Figure 6.**

(A) The oncoPrint of the top 20 mutated genes in high and low IKCscore groups in the TCGA-LUAD cohort. (B) KEAP1 and STK11 mutations were significantly correlated with lower IKCscore compared with wild type (Wilcoxon test,  $p = 2.4e-11$ ,  $p = 1.7e-10$ , respectively). (C) The oncoPrint of top 20 mutated genes in high and low IKCscore groups in TCGA-LUSC cohort. (D) KEAP1 and STK11 mutations were significantly correlated with lower IKCscore compared with wild type (Wilcoxon test,  $p = 0.00083$ ,  $p = 0.11$ , respectively). (E-F) Mutant pathway enrichment in responders (E) and non-responders (F).

**Table S1**

| Patient_ID | Response | Age | Tumor_types | Sex | Treatment   |
|------------|----------|-----|-------------|-----|-------------|
| Patient_1  | NR       | 41  | Others      | M   | Combination |
| Patient_2  | NR       | 43  | SQC         | M   | Combination |
| Patient_3  | R        | 56  | ADC         | M   | Combination |
| Patient_4  | NR       | 65  | ADC         | M   | Combination |
| Patient_5  | NR       | 51  | Others      | F   | Combination |
| Patient_6  | NR       | 63  | ADC         | M   | Monotherapy |
| Patient_7  | NR       | 51  | ADC         | M   | Combination |
| Patient_8  | NR       | 68  | ADC         | M   | Combination |
| Patient_9  | NR       | 63  | Others      | M   | Combination |
| Patient_10 | NR       | 63  | SQC         | M   | Combination |
| Patient_11 | NR       | 39  | SQC         | F   | Combination |
| Patient_12 | R        | 74  | SQC         | M   | Combination |
| Patient_13 | NR       | 59  | ADC         | M   | Combination |
| Patient_14 | NR       | 46  | ADC         | M   | Combination |
| Patient_15 | NR       | 68  | Others      | M   | Combination |
| Patient_16 | NR       | 53  | ADC         | M   | Combination |
| Patient_17 | R        | 52  | SQC         | M   | Combination |
| Patient_18 | R        | 56  | ADC         | M   | Combination |
| Patient_19 | NR       | 49  | ADC         | M   | Combination |
| Patient_20 | NR       | 57  | ADC         | M   | Combination |
| Patient_21 | R        | 31  | SQC         | F   | Combination |
| Patient_22 | NR       | 68  | SQC         | M   | Monotherapy |
| Patient_23 | NR       | 55  | Others      | F   | Combination |
| Patient_24 | NR       | 59  | SQC         | M   | Monotherapy |
| Patient_25 | NR       | 53  | ADC         | F   | Monotherapy |
| Patient_26 | R        | 54  | ADC         | M   | Monotherapy |
| Patient_27 | R        | 64  | Others      | M   | Monotherapy |
| Patient_28 | NR       | 58  | SQC         | M   | Monotherapy |
| Patient_29 | R        | 54  | ADC         | M   | Monotherapy |
| Patient_30 | R        | 65  | ADC         | M   | Combination |
| Patient_31 | R        | 76  | ADC         | M   | Combination |
| Patient_32 | R        | 50  | ADC         | F   | Combination |
| Patient_33 | NR       | 81  | SQC         | F   | Monotherapy |
| Patient_34 | R        | 50  | ADC         | F   | Monotherapy |
| Patient_35 | NR       | 52  | Others      | F   | Combination |
| Patient_36 | NR       | 56  | ADC         | M   | Combination |
| Patient_37 | NR       | 58  | ADC         | M   | Monotherapy |
| Patient_38 | R        | 72  | ADC         | M   | Combination |
| Patient_39 | NR       | 54  | SQC         | F   | Combination |
| Patient_40 | R        | 75  | ADC         | M   | Monotherapy |
| Patient_41 | R        | 62  | SQC         | M   | Combination |
| Patient_42 | NR       | 66  | ADC         | F   | Combination |
| Patient_43 | R        | 52  | ADC         | M   | Combination |
| Patient_44 | R        | 54  | ADC         | M   | Combination |
| Patient_45 | R        | 69  | SQC         | M   | Combination |
| Patient_46 | R        | 54  | SQC         | M   | Combination |
| Patient_47 | R        | 59  | ADC         | M   | Combination |
| Patient_48 | NR       | 55  | ADC         | M   | Combination |
| Patient_49 | NR       | 63  | ADC         | M   | Combination |
| Patient_50 | NR       | 66  | SQC         | M   | Combination |
| Patient_51 | R        | 56  | Others      | M   | Combination |
| Patient_52 | NR       | 56  | ADC         | M   | Combination |
| Patient_53 | R        | 58  | ADC         | M   | Combination |
| Patient_54 | NR       | 59  | Others      | M   | Combination |
| Patient_55 | R        | 78  | ADC         | M   | Monotherapy |
| Patient_56 | NR       | 69  | ADC         | M   | Combination |
| Patient_57 | NR       | 48  | ADC         | M   | Combination |
| Patient_58 | NR       | 75  | SQC         | M   | Combination |
| Patient_59 | R        | 69  | SQC         | M   | Combination |
| Patient_60 | NR       | 59  | ADC         | M   | Combination |
| Patient_61 | R        | 68  | ADC         | M   | Combination |
| Patient_62 | NR       | 66  | SQC         | M   | Combination |
| Patient_63 | NR       | 58  | SQC         | F   | Monotherapy |
| Patient_64 | NR       | 62  | ADC         | F   | Combination |
| Patient_65 | NR       | 57  | SQC         | M   | Combination |

**Table S1 Patient characteristics of the advanced NFH cohort treated with anti-PD-1 immunotherapy, related to Figure 1 and Table 1.**

## Table S2

| Immune score | KRT score      | Immune Checkpoint score |
|--------------|----------------|-------------------------|
| MS4A6A       | KRTAP5-5       | CD274                   |
| C1QC         | KCNC1          | PDCD1LG2                |
| HLA-DQB1     | ADAM30         | CTLA4                   |
| RAMP2        | CELF3          | PDCD1                   |
| MATN3        | PNMA5          | LAG3                    |
| CDK15        | POU3F2         | HAVCR2                  |
| WNT2         | UNC80          | TIGIT                   |
| FOLR2        | TMEM132D       |                         |
| HPGD         | ATP2B3         |                         |
| KDR          | CPLX2          |                         |
| LGMN         | ZFP42          |                         |
| PTGER2       | INA            |                         |
| F13A1        | KRTAP5-1       |                         |
| SLCO2B1      | GP2            |                         |
| TMEM100      | SCGN           |                         |
|              | ST18           |                         |
|              | BLOC1S5-TXNDC5 |                         |
|              | FMN2           |                         |
|              | ANO3           |                         |

Table S2 Gene lists of immune, KRT, and Immune Checkpoint patterns, related to Figure 1.
